# Supplementary material for: GOT1 inhibition promotes pancreatic cancer cell death by ferroptosis
Source: PubMed Central journal article supplement (PMC8357841; doi:10.1038/s41467-021-24859-2), 2021-08-11
Supplement: 41467_2021_24859_MOESM1_ESM.pdf [file 41467_2021_24859_MOESM1_ESM.pdf]

**GOT1 Inhibition promotes Pancreatic Cancer cell death by Ferroptosis**

Daniel M. Kremer<sup>1,2</sup>, Barbara S. Nelson<sup>3</sup>, Lin Lin<sup>1</sup>, Emily L. Yarosz<sup>4</sup>, Christopher J. Halbrook<sup>1</sup>, Samuel A. Kerk<sup>3</sup>, Peter Sajjakulnukit<sup>3</sup>, Amy Myers<sup>1</sup>, Galloway Thurston<sup>1</sup>, Sean W. Hou<sup>1</sup>, Eileen S. Carpenter<sup>5</sup>, Anthony C. Andren<sup>1</sup>, Zeribe C. Nwosu<sup>1</sup>, Nicholas Cusmano<sup>1</sup>, Stephanie Wisner<sup>1</sup>, Nneka E. Mbah<sup>1</sup>, Mengrou Shan<sup>1</sup>, Nupur K. Das<sup>1</sup>, Brian Magnuson<sup>6,7</sup>, Andrew C. Little<sup>7</sup>, Milan R. Savani<sup>8</sup>, Johanna Ramos<sup>1</sup>, Tina Gao<sup>1</sup>, Stephen A. Sastra<sup>9,10</sup>, Carmine F. Palermo<sup>9,10</sup>, Michael A. Badgley<sup>9-11</sup>, Li Zhang<sup>1</sup>, John M. Asara<sup>12,13</sup>, Samuel K. McBrayer<sup>14</sup>, Marina Pasca di Magliano<sup>7,15,16</sup>, Howard C. Crawford<sup>1,7</sup>, Yatrik M. Shah<sup>1,5,7</sup>, Kenneth P. Olive<sup>9,10</sup>, Costas A. Lyssiotis<sup>1,5,7\*</sup>

<sup>1</sup>Department of Molecular & Integrative Physiology, University of Michigan, Ann Arbor, MI 48109, USA

<sup>2</sup>Graduate Program in Chemical Biology, University of Michigan, Ann Arbor, MI 48109, USA

<sup>3</sup>Graduate Program in Cancer Biology, University of Michigan, Ann Arbor, MI 48109, USA

<sup>4</sup>Immunology Graduate Program, University of Michigan, Ann Arbor, MI 48109, USA

<sup>5</sup>Department of Internal Medicine, Division of Gastroenterology and Hepatology, University of Michigan, Ann Arbor, MI 48109, USA

<sup>6</sup>Department of Biostatistics, School of Public Health, University of Michigan, Ann Arbor, MI.

<sup>7</sup>Rogel Cancer Center, University of Michigan, Ann Arbor, MI 48109, USA

<sup>8</sup>Medical Scientist Training Program, University of Texas Southwestern Medical Center, Dallas, TX 75390, USA

<sup>9</sup>Division of Digestive and Liver Diseases, Department of Medicine, Columbia University Medical Center, New York, NY 10032, USA

<sup>10</sup>Herbert Irving Comprehensive Cancer Center, Columbia University Medical Center, New York, NY 10032, USA

<sup>11</sup>Department of Pathology, Columbia University Medical Center, New York, NY 10032, USA

<sup>12</sup>Division of Signal Transduction and Mass Spectrometry Core, Beth Israel Deaconess Medical Center, Boston, MA, USA 02115

<sup>13</sup>Department of Medicine, Harvard Medical School, Boston, MA, USA 02115

<sup>14</sup>Children's Medical Center Research Institute and Department of Pediatrics, University of Texas Southwestern Medical Center, Dallas, TX 75390, USA

<sup>15</sup>Department of Surgery, University of Michigan, Ann Arbor, MI 48109, USA

<sup>16</sup>Department of Cell and Developmental Biology, University of Michigan, Ann Arbor, Michigan 48109, USA.

\* Correspondence: [clyssiot@med.umich.edu](mailto:clyssiot@med.umich.edu)

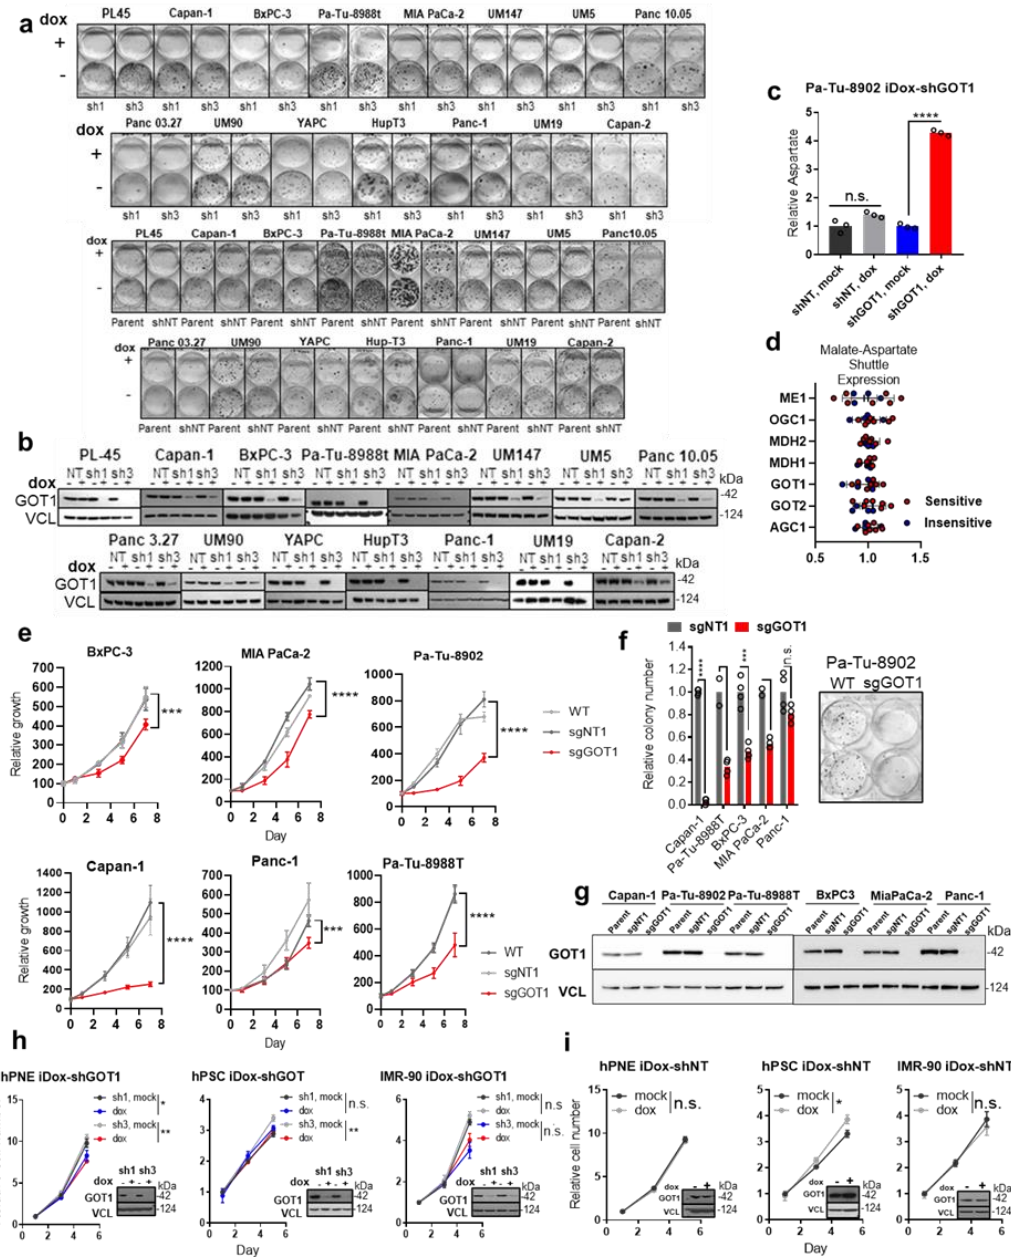

**Supplementary Figure 1. GOT1 is dispensable in non-transformed cell lines.**

**a-b)** Colony formation assays (a) and GOT1 immunoblots (b) from 1d. Blots in (b) are representative of three independent experiments. **c)** LC-MS/MS measurements of aspartate following five days of knockdown, n=3 biologically independent experiments, \*\*\*\*P<0.0001 iDox-shGOT1. **d)** mRNA expression of malate-aspartate shuttle components in PDA cell lines from the Cancer Cell Line Encyclopedia. **e)** Proliferation (n=4 biologically independent samples); BxPC-3 \*\*\*P=0.0007; MIA PaCa-2 \*\*\*\*P=<0.0001; \*\*\*\*Pa-Tu-8902 P=<0.0001, \*\*\*\*Capan-1 P=<0.0001, Panc-1 \*\*\*P= 0.0001, Pa-Tu-8988T \*\*\*\*P= <0.0001; **f)** Colony formation Capan-1, n=4, \*\*\*\*P=<0.0001; Pa-Tu-8902, n=2, BxPC-3, n=4, \*\*P=0.0003, MIA PaCa-2, n=2; Panc-1, n=4, n.s. P=0.0950. Derived from biologically independent samples; **g)** Western blot following sgGOT1 corresponding to figures 1e-f and **Supplementary Data 1e**. Blots are representative of two independent experiments. **h-i)** Proliferation of immortalized non-transformed human cell lines normalized to day 1 for iDox-shGOT1 (h) hPNE, n=3, \*P=0.0358 sh1 and \*\*P=0.0054 sh3; hPSC, n=3, n.s. P= 0.0614 sh1 and \*\*P=0.0072 sh3; IMR-90, n=4, n.s. P=0.0379 sh1, and n.s. P=0.0974 sh3 and iDox-shNT (i) hPNE, n=3, n.s. P=0.2783; hPSC, n=3, n.s. P=0.0126; IMR-90, n=4, n.s. P=0.2293 derived from biologically independent samples. Error bars represent mean ± SD. Two-tailed unpaired T-test or 1-way ANOVA: Non-significant P > 0.05 (n.s. or # as noted). Source data are provided as a Source Data file.

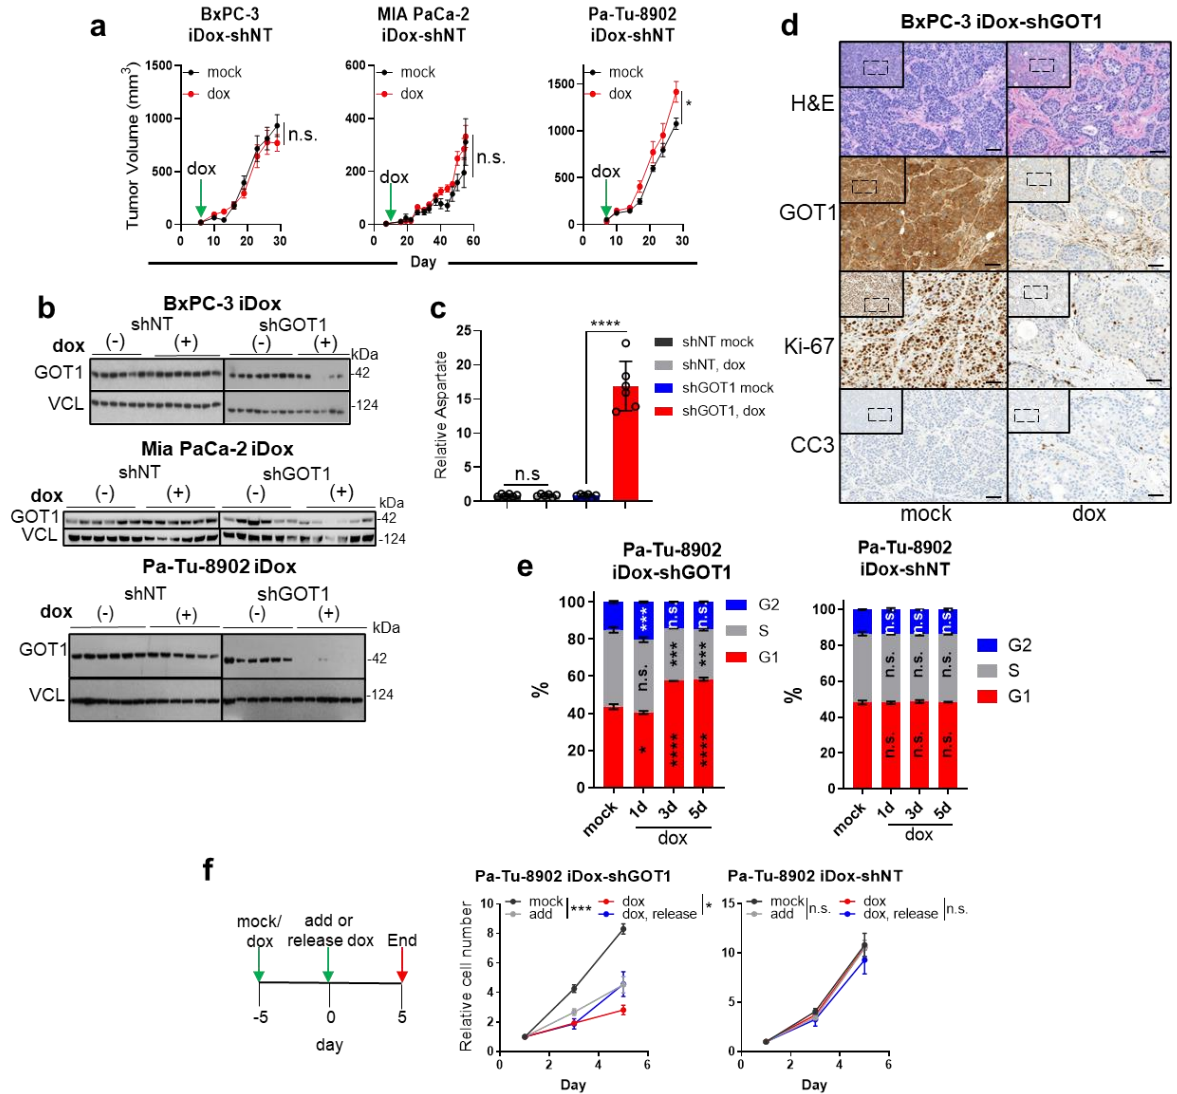

**Supplementary Figure 2. GOT1 inhibition is cytostatic.**

**a)** Growth of subcutaneous xenograft tumors containing non-targeting (NT) vectors treated with dox (red) or vehicle (black) (n= 6 tumors) corresponding to Figure 1e, BxPC3 n.s. P= 0.2254; MIA PaCA-2 n.s. P= 0.8362; Pa-Tu-8902 \*P= 0.0227. **b)** Immunoblots for GOT1 from tumors in **1g** and **Supplementary Fig. 2a**. Blots are representative of two independent experiments for BxPC-3 and Pa-Tu-8902 and one independent experiment for MIA PaCa-2. **c)** LC-MS/MS measurements of aspartate taken from homogenized Pa-Tu-8902 iDox-shGOT1 tumors, n=6, n.s. P=0.9195 and \*\*\*\*P<0.0001. **d)** Histology of BxPC-3 iDox-shGOT1 subcutaneous xenograft tumors from vehicle- or dox-treated mice. H&E, Hematoxylin and Eosin, CC3, cleaved caspase 3. Scale bars represent 50 μm. Micrographs are representative of 6 independent tumors. **e)** Cell cycle upon 1, 3, or 5 days of dox treatment. Significance values are in relation to iDox-shGOT1 mock (n=3 biologically independent samples), G2 1d \*\*\*P=0.0002, G1 1d \*P=0.0264; S 3d \*\*\*P=0.0001; G1 3d \*\*\*\*P=<0.0001; S 5d \*\*\*P=0.0001; G1 5d \*\*\*\*P<0.0001. **f)** Proliferation kinetics following GOT1 knockdown. Cells were untreated (black), dox was added to untreated cells (blue), pre-treated with dox and chronically exposed to dox (grey), or released from dox pretreated cells (red). Relative cell number at day 5 normalized to day 1 is displayed, (n=3 biologically independent samples), \*\*\*P=0.0002 mock and add; \*P=0.0202 dox and dox, release. Error bars represent mean ± SD or mean ± SEM in (a) and (d). Two-tailed unpaired T-test or 1-way ANOVA: Non-significant P > 0.05 (n.s. or # as noted). Source data are provided as a Source Data file.

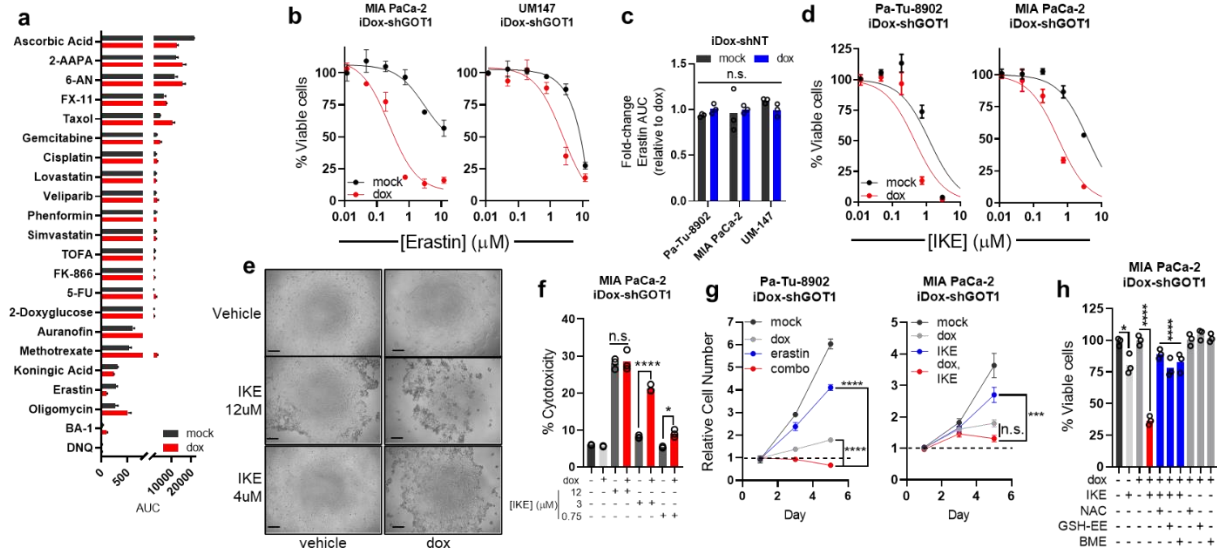

**Supplementary Figure 3.** GOT1 Inhibition sensitizes PDA to  $x_c^-$  inhibitors.

**a)** Area under the curve (AUC) in cell viability for each compound treated for 72 hours, n=3 biologically independent samples. **b)** Cell viability dose response curves for erastin after 24 hours in iDox-shGOT1 expressing cell lines. **c)** AUC fold-change for shNT expressing cell lines, n=3 biologically independent samples. **d)** Imidazole ketone erastin (IKE) cell viability dose curves, n=3 biologically independent samples. **e)** Bright field images of Pa-Tu08982 iDox-shGOT1 cells treated with IKE for 24 hours. Representative of two independent experiments. Scale bars represent 20 $\mu$ m. **f)** % Cytotoxicity following GOT1 knockdown and IKE treatment for 24 hours. Cytotoxicity was measured by LDH release and normalized to a cell lysis control, n=3 biologically independent samples, \*\*\*\*P=<0.0001 and \*P=0.0311. **g)** Proliferation after 5 days of dox treatment with the indicated conditions. 750nM of Erastin or IKE was administered on day 1 and conditions are normalized to day 1 (n=3 biologically independent samples), \*\*\*\*P=<0.0001 Pa-Tu-8902 and \*\*\*P=0.0005 MIA PaCa-2. **h)** Cell viability of Mia PaCa-2 iDox-shGOT1 after 5 days of dox culture then 750nM IKE co-cultured with the indicated conditions (n=3 biologically independent samples). \*P=0.0104 vehicle vs IKE, \*\*\*\*P=<0.0001 dox vs dox/IKE, \*\*\*\*P=<0.0001 dox/IKE vs, dox/IKE/NAC, GSH-EE, or BME. Error bars represent mean  $\pm$  SD. Two-tailed unpaired T-test or 1-way ANOVA: Non-significant P> 0.05 (n.s. or # as noted). Source data are provided as a Source Data file.

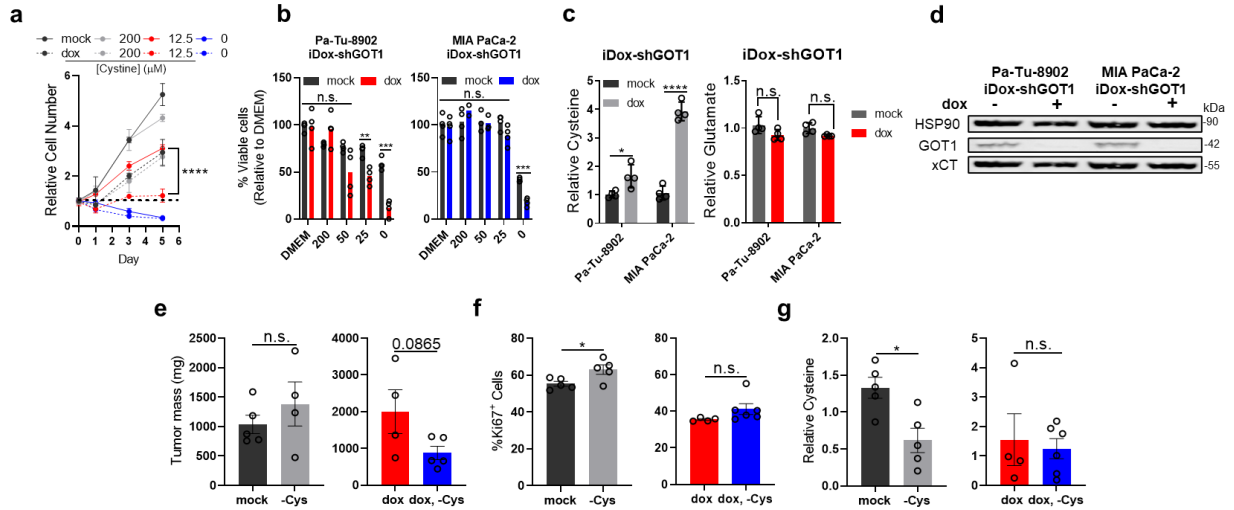

**Supplementary Figure 4.** PDA cultures require exogenous cystine for proliferation and viability.

**a)** Mia PaCa-2 iDox-shGOT1 proliferation following 5 days of GOT1 knockdown and the indicated media conditions (n=3 biologically independent experiments), \*\*\*\*P=<0.0001. **b)** Cell viability of Pa-Tu-8902 iDox-shGOT1 (red) and MIA PaCa-2 iDox-shGOT1 (blue) following 5 days of dox pre-treatment and 24 hours of the indicated cystine concentrations (n=4 biologically independent experiments), \*\*P=0.002013 and \*\*\*P=0.000125 Pa-Tu-8902; \*\*\*P=0.000062 MIA PaCa-2. **c)** LC-MS/MS measures of intracellular cysteine and glutamate upon GOT1 knockdown, n=4 independent samples, Cysteine \*P=0.0239 Pa-Tu-8902; \*\*\*\*P=<0.0001 MIA PaCa-2. **d)** xCT levels following GOT1 knockdown. Representative of 2 independent experiments. **e)** Post-treatment tumor mass (mock, n=5 tumors), (-Cys, 4), (dox, n=4), and (dox, -Cys, n=5). n.s. P=0.3873 mock vs. -Cys; n.s. P=0.0865 dox vs. dox/-Cys. **f)** Ki-67 staining in post-treatment tumors, n=5, \* P=0.0294 mock vs.-Cys; n.s. P=0.1607 dox vs. dox/-Cys. **g)** Cysteine levels in tumors at endpoint, n=5, n.s. P=0.0113 mock vs.-Cys and n.s. P=0.7171 dox vs. dox/-Cys. Error bars represent mean ± SD (Figures a-c) or mean ± S.E.M (Figures e-g). Two-tailed unpaired T-test or 1-way ANOVA: Non-significant P> 0.05 (n.s. or # as noted). Source data are provided as a Source Data file.

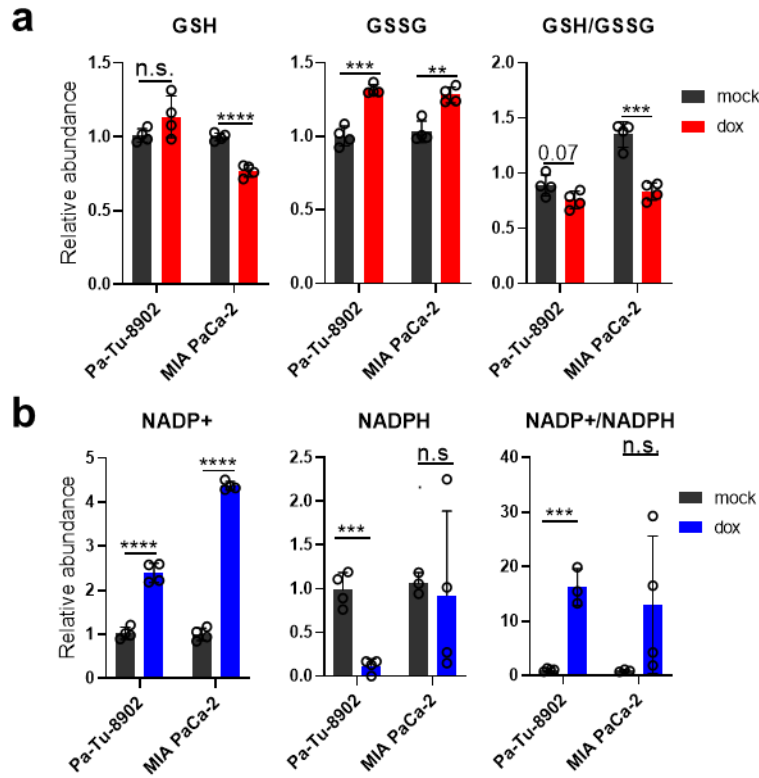

**Supplementary Figure 5.** GOT1 inhibition promotes redox stress. **a-b)** LC-MS/MS measures of redox co-factors, n=4 biological replicates. GSH n.s. P= 0.1370 Pa-Tu8902; \*\*\*\* P <0.0001 MIA PaCa-2, GSSG \*\*\* P= 0.0002; \*\* P= 0.0015; GSH/GSSG n.s. P= 0.0774; \*\*\* P= 0.0003. NADP+ \*\*\*\* P= <0.0001 Pa-Tu-8902 and MIA PaCa-2; NADPH \*\*\* P= 0.0002; n.s. P= 0.8178. NADP+/NADPH \*\*\* P= 0.0003; n.s. P= 0.1663. Error bars represent mean  $\pm$  SD. Two-tailed unpaired T-test: Non-significant P> 0.05 (n.s. or # as noted). Source data are provided as a Source Data file.



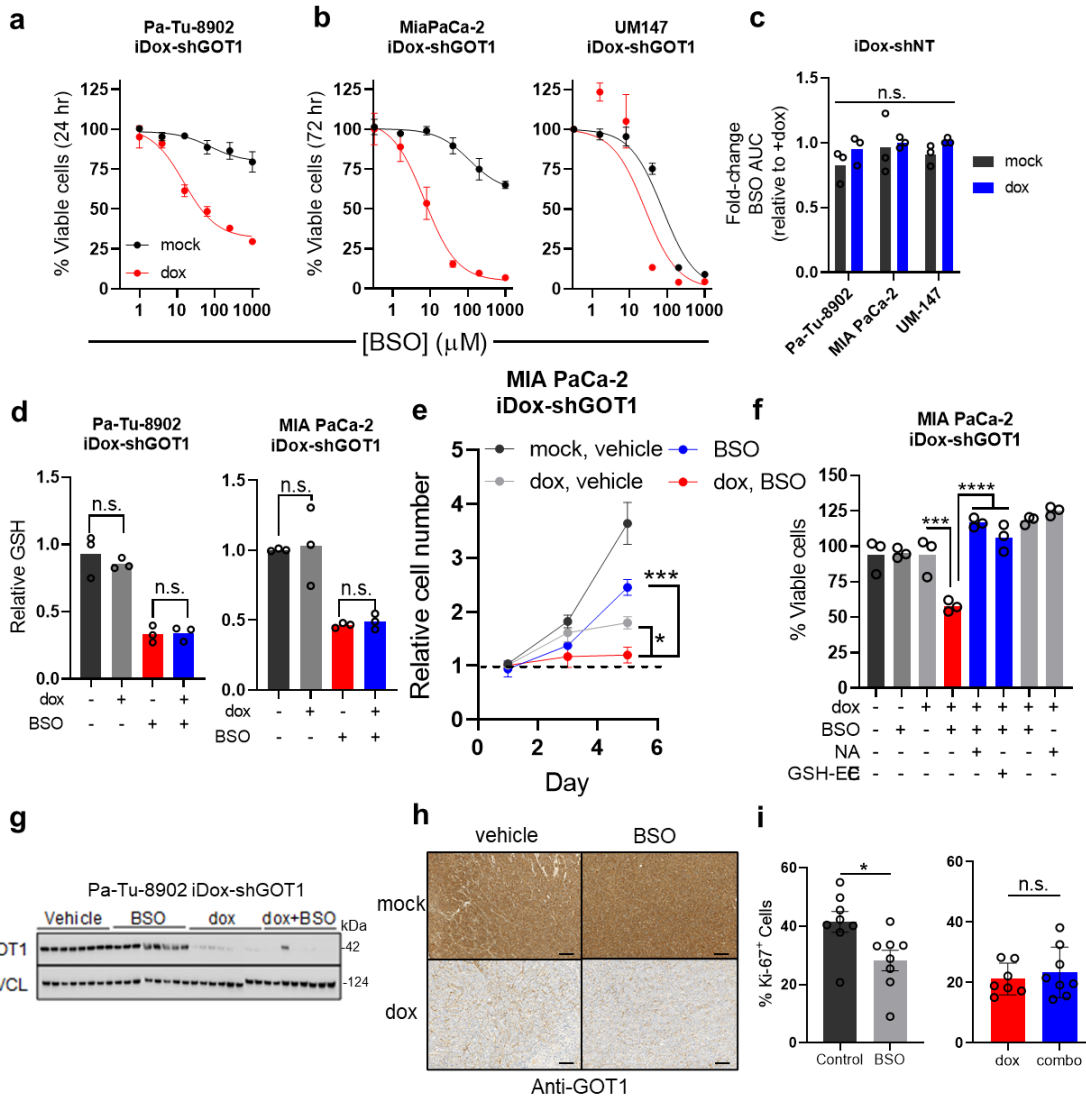

**Supplementary Figure 6.** PDA require GSH synthesis under GOT1 deficient conditions.

**a-b)** Cell viability dose response at 24 (a) and 72 hours (b), n=3 biologically independent samples representative of two independent experiments. **c)** AUC fold change in shNT matched cell lines, n=3 biologically independent samples. **d)** GSH-glo measures, n=3 biologically independent samples, n.s.  $P=0.7408$  and  $P=0.9996$  in Pa-Tu-8902; n.s.  $P=0.9947$  and  $P=0.9956$  in MIA PaCa-2. **e)** Proliferation after 5 days of GOT1 knockdown. BSO 40  $\mu\text{M}$  treatment was initiated on day 1 and curves are normalized to day 1, n=3 biologically independent samples, \*\*\*  $P=0.0007$  and \*  $P=0.0488$ . **f)** Relative viability after 5 days of GOT1 knockdown and treatment with 40  $\mu\text{M}$  BSO or co-treatment with 0.5mM N-acetyl cysteine (NAC) 0.5mM GSH-ethyl ester (GSH-EE), n=3 biologically independent samples, \*\*\*  $P=0.0006$ ; \*\*\*\*  $P<0.0001$ . **g)** Immunoblot analysis of GOT1 from tumors in Figure 3f (n=8 tumors). Representative of a single independent experiment. **h)** Immunohistochemical staining of GOT1, n=8 tumors. Scale bars represent 50  $\mu\text{m}$ . **i)** Quantification of Ki-67 staining in tumors from 3f, n=8 tumors, \*  $P=0.0194$ . Error bars represent mean  $\pm$  SD or mean  $\pm$  SEM in (i). Two-tailed unpaired T-test or 1-way ANOVA: Non-significant  $P>0.05$  (n.s. or # as noted). Data are provided as a Source Data file.

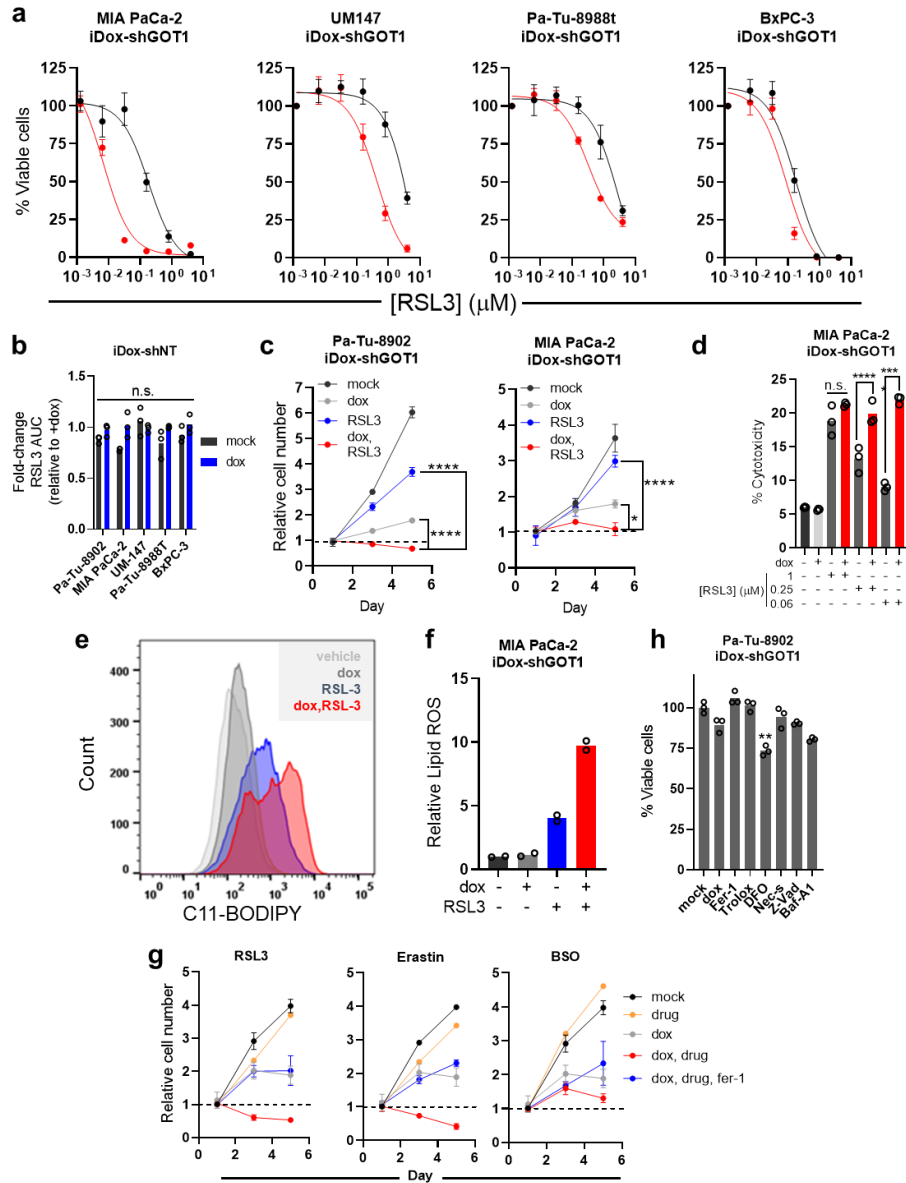

**Supplementary Figure 7.** Additional data demonstrating GOT1 inhibition sensitizes PDA to ferroptosis.

**a)** Cell viability dose response curves at 24 hours,  $n=3$  biologically independent samples. **b)** Fold change in cell viability AUC in shNT cells,  $n=3$  biologically independent samples. **c)** Proliferation following 5 days of knockdown and treatment with the indicated conditions. 32nM of RSL3 was administered on day 1. Cell numbers are normalized to day 1 for each condition,  $n=3$  biologically independent samples. \*\*\*\* $P < 0.0001$ . **d)** % Cytotoxicity following GOT1 knockdown and RSL3 treatment at 24 hours. Cytotoxicity was measured by LDH release and normalized to a cell lysis control,  $n=3$  biologically independent samples. \*\*\*\* $P < 0.0001$ . **e)** Distribution of Pa-Tu-8902 iDox-shGOT1 cells positive for C11-BODIPY corresponding to (4e). **f)** Fold change in viable MIA PaCa-2 iDox-shGOT1 cells positive for C-11 BODIPY, following 5 days of GOT1 knockdown. Cells were treated with the indicated conditions for 6 hours prior to measurements: vehicle (0.1% DMSO) +/- dox (black and grey), 1 $\mu\text{M}$  RSL3. Data are normalized to the -dox and vehicle-treated condition,  $n=2$  biologically independent samples. **g)** Proliferation of Pa-Tu-8902 iDox-shGOT1 following 5 days of knockdown and treatment with the indicated conditions ( $n=3$  biologically independent samples). 32nM RSL3, 750nM Erastin, or 40 $\mu\text{M}$  BSO +/- 1 $\mu\text{M}$  Ferrostatin-1 (Fer-1) were used. Cell numbers are normalized to day 1 for each condition,  $n=3$  biologically independent samples. **h)** Single agent viability controls for 4f-g,  $n=3$  biologically independent samples. DFO vs. dox \*\* $P=0.0016$ . Error bars represent mean  $\pm$  SD. Two-tailed unpaired T-test or 1-way ANOVA. Non-significant  $P > 0.05$  (n.s. or # as noted). Source data are provided as a Source Data file.



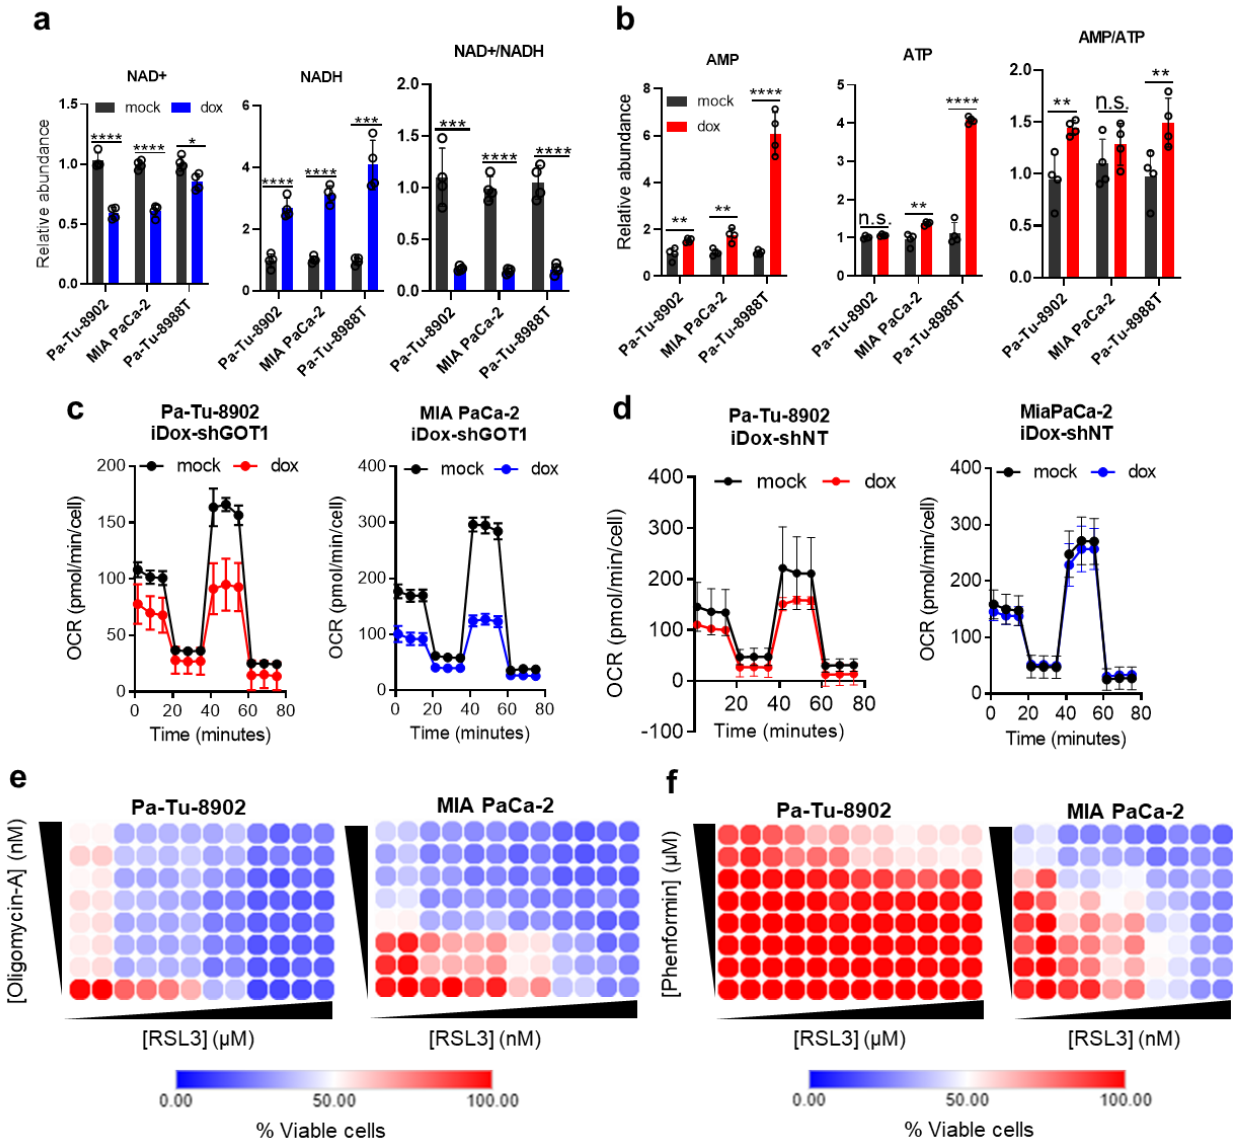

**Supplementary Figure 8.** Inhibition of mitochondrial metabolism potentiates ferroptosis

**a-b)** LC-MS/MS measurements of NAD<sup>+</sup>, NADH, AMP, and ATP following 5 days of GOT1 knockdown, n=4 biologically independent experiments. NAD<sup>+</sup> \*\*\*\*P= <0.0001; \*P=0.0158. NADH \*\*\*\*P=<0.0001; \*\*\*P=0.0003. NAD<sup>+</sup>/NADH \*\*\*P= 0.0008; \*\*\*\*P=<0.0001. AMP \*\*P=0.0054; \*\*P=0.0032; \*\*\*\*P=<0.0001. ATP \*\*P=0.0025; \*\*\*\*P=<0.0001. **c-d)** Oxygen consumption rate following GOT1 knockdown, n=3 biologically independent experiments. **e-f)** Dose response matrix of cell viability following 72 hours co-drug treatment, n=2 biologically independent experiments. Error bars represent mean ± SD. Two-tailed unpaired T-test or 1-way ANOVA: Non-significant P> 0.05 (n.s. or # as noted). Source data are provided as a Source Data file.

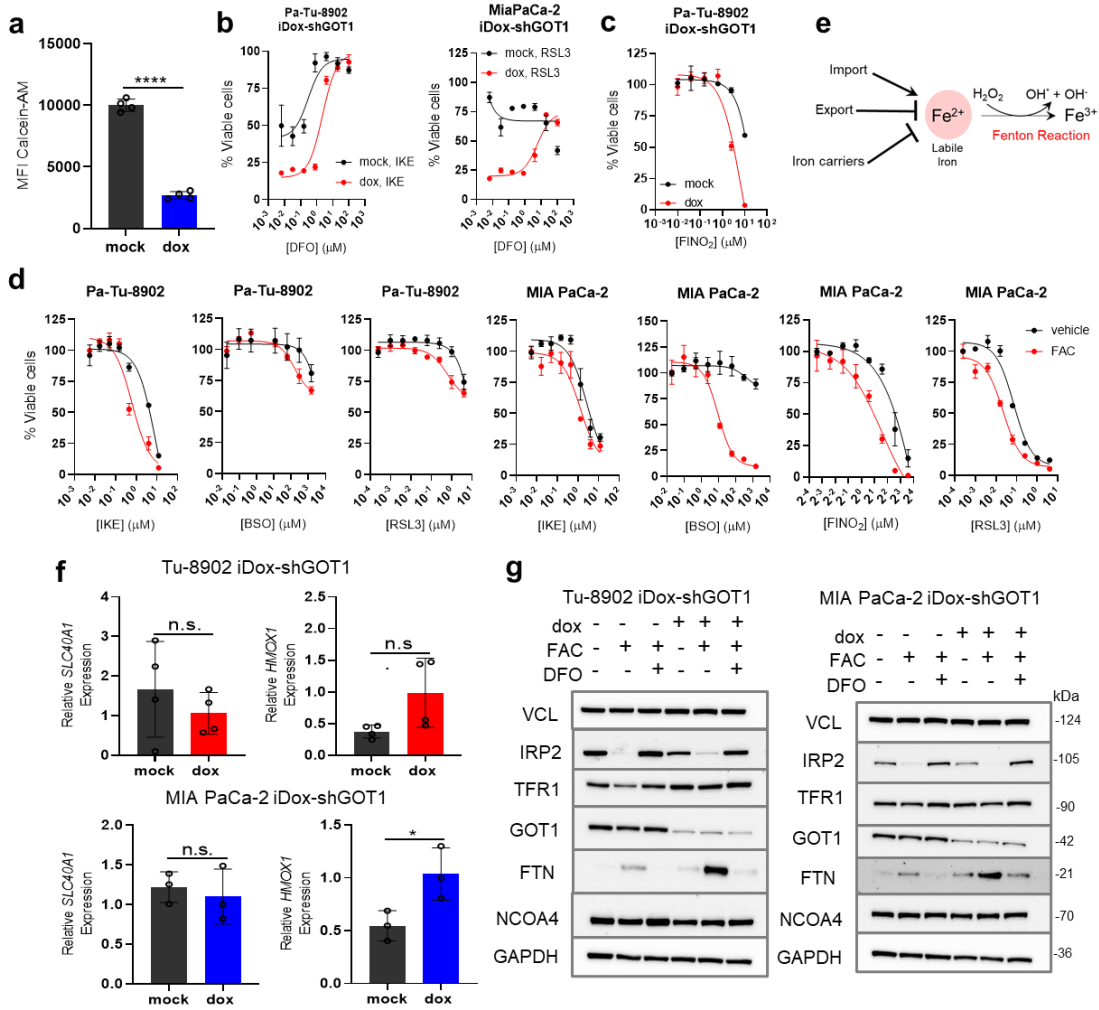

**Supplementary Figure 9.** Labile iron potentiates ferroptosis.

**a)** Calcein-AM MFI in Mia PaCa-2 iDox-shGOT1 following GOT1 knockdown, n=3 biologically independent experiments. \*\*\*\* P= <0.0001. **b-d)** Cell viability dose response curves of various ferroptosis inducers treated with DFO (n=3 biologically independent experiments) (b), FINO<sub>2</sub> following GOT1 knockdown (c), or 200 $\mu\text{M}$  of ferric ammonium citrate (FAC) (d), n=3 biologically independent experiments. **e)** Scheme of iron release mechanisms. **f)** Expression of *SLC40A1* and *HMOX1* in Pa-Tu08902 (red), n=4 biological replicates, or Mia PaCa-2 iDox-shGOT1 cells (blue), n=3 biological replicates. \* P= 0.0417. **g)** Westerns of iron responsive genes following GOT1 knockdown. Representative of two independent experiments. Error bars represent mean  $\pm$  SD. Two-tailed unpaired T-test or 1-way ANOVA: Non-significant P> 0.05 (n.s. or # as noted). Source data are provided as a Source Data file.

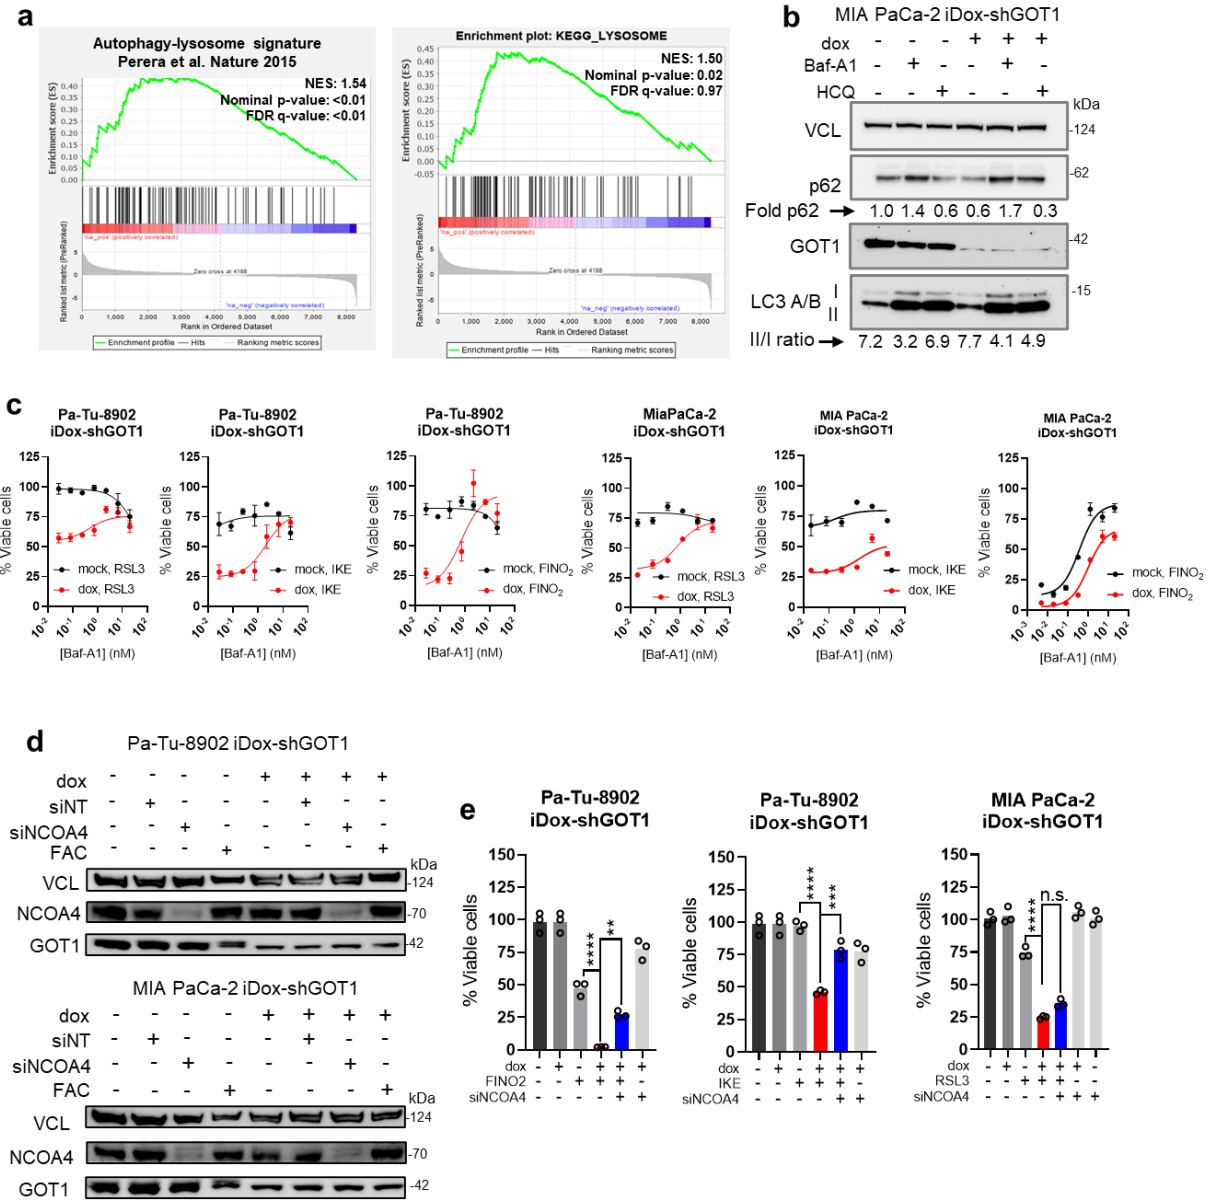

**Supplementary Figure 10.** Blocking lysosomal acidification or ferritinophagy blocks the GOT1 potentiation of ferroptosis.

**a)** Enrichment of lysosomal transcripts following GOT1 silencing in Pa-Tu-8902 iDox-shGOT1, n=3 biologically independent experiments. **b)** Western blot of autophagy markers in MIA PaCa-2. Representative of two independent experiments. **c)** Cell viability of cells co-treated with ferroptosis triggering compounds and increasing doses of Baf-A1, n=2 biologically independent experiments. **d)** Western blots analysis of NCOA4 after siNCOA4. Representative of three independent experiments. **e)** Knockdown of NCOA4 rescues GOT1-mediated ferroptosis in Pa-Tu-8902 and MIA PaCa-2, n=3 biologically independent experiments. Pa-Tu-8902 FINO2 vs. dox/FINO2 \*\*\*\*P<0.0001; dox/FINO2 vs. dox/FINO2/siNCOA4 \*\*\*P=0.0026. IKE vs. dox/IKE \*\*\*\*P<0.0001; IKE vs. dox/IKE/siNCOA4 \*\*\*P=0.0005. MIA PaCa-2 RSL3 vs. dox/RSL3 \*\*\*\*P<0.0001. Error bars represent mean ± SD. Two-tailed unpaired T-test or 1-way ANOVA: Non-significant P> 0.05 (n.s. or # as noted). Source data are provided as a Source Data file.

**Supplementary Table 1:** Primer Sequences used in this study.

|                                                 |
|-------------------------------------------------|
| hRPS21_F TCGCATCATCGGTGCCAAG                    |
| hRPS21_R GCCATTAAACCTGCCTGTGAC                  |
| hSLC40A1_F CCAAAGGGATTGGATTGTTG                 |
| hSLC40A1_R CCAAAGGGATTGGATTGTTTCGTATTGTGGCATTCA |
| hHMOX1_F GGCAGAGGGTGATAGAAGAGG                  |
| hHMOX1_R AGCTCCTGCAACTCCTCAA                    |

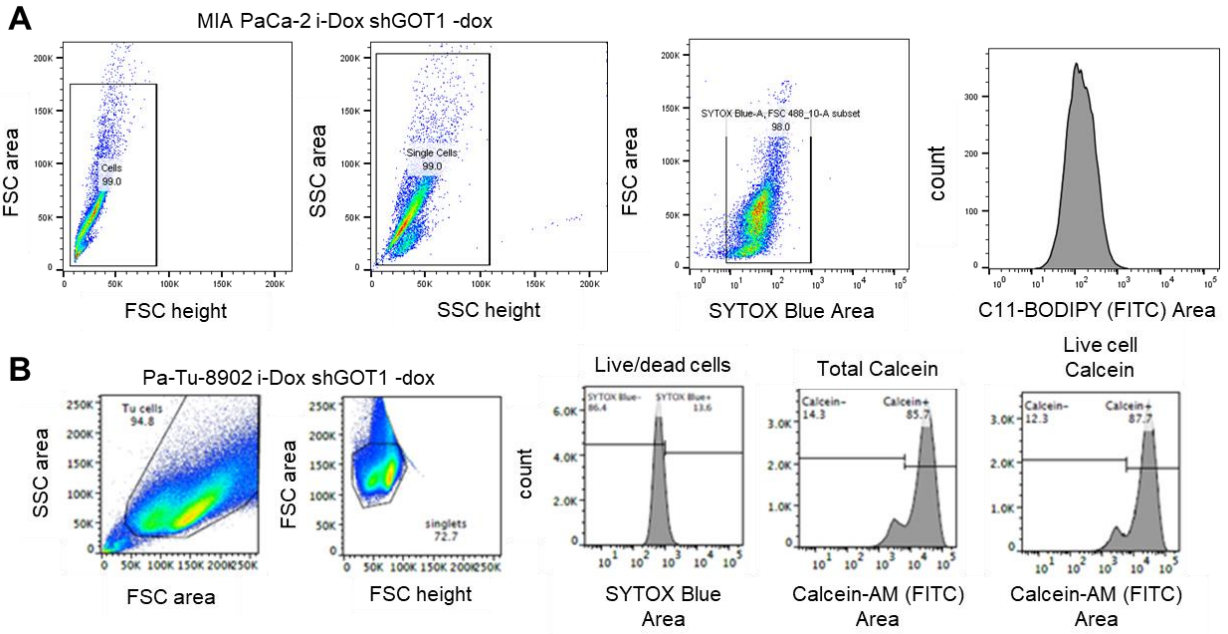

**Supplementary Figure 11.** Flow cytometry gating  
**a-b)** Representative C11 BODIPY (a) and calcein-AM gating strategy (b).
