# Supplementary material for: GOT1 inhibition promotes pancreatic cancer cell death by ferroptosis
Source: PubMed Central journal article supplement (PMC8357841; doi:10.1038/s41467-021-24859-2), 2021-08-11
Supplement: 41467_2021_24859_MOESM2_ESM.pdf [file 41467_2021_24859_MOESM2_ESM.pdf]

**Editorial Note:** This manuscript has been previously reviewed at another journal that is not operating a transparent peer review scheme. This document only contains reviewer comments and rebuttal letters for versions considered at Nature Communications.

#### REVIEWERS' COMMENTS

Reviewer #1 (Remarks to the Author):

The authors largely addressed the concerns of the reviewer. I support the publication.

## REVIEWERS' COMMENTS

Reviewer #1 (Remarks to the Author):

The authors largely addressed the concerns of the reviewer. I support the publication.

We thank the reviewer for the positive comments and support for publication.
